# Supplementary material for: Evaluation of the Performance of Atomic Diffusion Additive Manufacturing Electrodes in Electrical Discharge Machining
Source: MDPI journal article supplement (doi:10.3390/ma15175953), 2022-08-28
Supplement: s1 [file s1]

Supplementary Material

# Evaluation of the performance of Atomic Diffusion Additive Manufacturing electrodes in Electrical Discharge Machining

Table S1. Results of EDM test. Electrolytic electrode. Strategy 1.

| Replica | Initial electrode weight (g) | Initial work-piece weight (g) | Final electrode weight (g) | Final workpiece weight (g) | Electrode wear (g) | Workpiece wear (g) | Electrode wear (mm <sup>3</sup> ) | Workpiece wear (mm <sup>3</sup> ) | Process time (min) | Electrode wear rate (%) | Stock removal rate (mm <sup>3</sup> /min) |
|---------|------------------------------|-------------------------------|----------------------------|----------------------------|--------------------|--------------------|-----------------------------------|-----------------------------------|--------------------|-------------------------|-------------------------------------------|
| 1       | 81.4487                      | 87.3913                       | 81.4323                    | 87.3315                    | 0.0164             | 0.0598             | 1.8306                            | 21.2007                           | 45                 | 8.635                   | 0.471                                     |
| 2       | 81.4323                      | 87.3315                       | 81.4152                    | 87.2562                    | 0.0171             | 0.0753             | 1.9087                            | 26.6958                           | 53                 | 7.150                   | 0.504                                     |
| 3       | 81.4152                      | 87.2562                       | 81.3998                    | 87.1894                    | 0.0154             | 0.0668             | 1.7190                            | 23.6823                           | 49                 | 7.259                   | 0.483                                     |

Table S2. Workpiece roughness measurements. Electrolytic electrode. Strategy 1.

| Replica | Measure-ment | Arithmetical mean roughness Ra (μm) | VDI   | Average VDI | Workpiece total average VDI |
|---------|--------------|-------------------------------------|-------|-------------|-----------------------------|
| 1       | 1            | 2.21                                | 26.89 | 26.72       | 25.48                       |
|         | 2            | 1.86                                | 25.80 |             |                             |
|         | 3            | 2.43                                | 25.06 |             |                             |
| 2       | 1            | 1.95                                | 26.89 | 25.34       | 25.48                       |
|         | 2            | 1.65                                | 25.39 |             |                             |
|         | 3            | 1.95                                | 27.71 |             |                             |
| 3       | 1            | 1.79                                | 25.80 | 24.37       |                             |
|         | 2            | 1.58                                | 24.35 |             |                             |
|         | 3            | 1.59                                | 25.80 |             |                             |

Table S3. Results of EDM test. Electrolytic electrode. Strategy 2.

| Replica | Initial electrode weight (g) | Initial work-piece weight (g) | Final electrode weight (g) | Final workpiece weight (g) | Electrode wear (g) | Workpiece wear (g) | Electrode wear (mm <sup>3</sup> ) | Workpiece wear (mm <sup>3</sup> ) | Process time (min) | Electrode wear rate (%) | Stock removal rate (mm <sup>3</sup> /min) |
|---------|------------------------------|-------------------------------|----------------------------|----------------------------|--------------------|--------------------|-----------------------------------|-----------------------------------|--------------------|-------------------------|-------------------------------------------|
| 1       | 81.3993                      | 87.5706                       | 81.3716                    | 87.4865                    | 0.0277             | 0.0841             | 3.0919                            | 29.8156                           | 50                 | 10.370                  | 0.596                                     |
| 2       | 81.3716                      | 87.4865                       | 81.3485                    | 87.4191                    | 0.0231             | 0.0674             | 2.5785                            | 23.8951                           | 43                 | 10.791                  | 0.556                                     |
| 3       | 81.3485                      | 87.4191                       | 81.3149                    | 87.3172                    | 0.0336             | 0.1019             | 3.7505                            | 36.1262                           | 58                 | 10.382                  | 0.623                                     |

Table S4. Workpiece roughness measurements. Electrolytic electrode. Strategy 2.

| Replica | Measure-<br>ment | Arithmetical<br>mean roughness<br>Ra ( $\mu\text{m}$ ) | VDI   | Average<br>VDI | Workpiece<br>total average<br>VDI |
|---------|------------------|--------------------------------------------------------|-------|----------------|-----------------------------------|
| 1       | 1                | 1.97                                                   | 25.89 | 25.68          |                                   |
|         | 2                | 1.85                                                   | 25.34 |                |                                   |
|         | 3                | 1.95                                                   | 25.80 |                |                                   |
| 2       | 1                | 2.03                                                   | 26.15 | 25.56          | 26.29                             |
|         | 2                | 1.68                                                   | 24.51 |                |                                   |
|         | 3                | 1.98                                                   | 25.93 |                |                                   |
| 3       | 1                | 1.96                                                   | 25.85 | 27.64          |                                   |
|         | 2                | 3.40                                                   | 30.63 |                |                                   |
|         | 3                | 1.87                                                   | 25.44 |                |                                   |

Table S5. Results of EDM test. Electrolytic electrode. Strategy 3.

| Replica | Initial electrode<br>weight (g) | Initial work-<br>piece weight (g) | Final electrode<br>weight (g) | Final workpiece<br>weight (g) | Electrode<br>wear (g) | Workpiece<br>wear (g) | Electrode<br>wear<br>( $\text{mm}^3$ ) | Workpiece<br>wear<br>( $\text{mm}^3$ ) | Process<br>time<br>(min) | Electrode<br>wear<br>rate (%) | Stock<br>removal rate<br>( $\text{mm}^3/\text{min}$ ) |
|---------|---------------------------------|-----------------------------------|-------------------------------|-------------------------------|-----------------------|-----------------------|----------------------------------------|----------------------------------------|--------------------------|-------------------------------|-------------------------------------------------------|
| 1       | 81.3142                         | 87.3186                           | 81.3051                       | 87.2613                       | 0.0091                | 0.0573                | 1.0158                                 | 20.3143                                | 45                       | 5.000                         | 0.451                                                 |
| 2       | 81.3051                         | 87.2613                           | 81.2863                       | 87.1423                       | 0.0188                | 0.1190                | 2.0985                                 | 42.1886                                | 95                       | 4.974                         | 0.444                                                 |
| 3       | 81.2863                         | 87.1423                           | 81.2669                       | 87.0192                       | 0.0194                | 0.1231                | 2.1655                                 | 43.6422                                | 97                       | 4.962                         | 0.450                                                 |

Table S6. Workpiece roughness measurements. Electrolytic electrode. Strategy 3.

| Replica | Measure-<br>ment | Arithmetical<br>mean roughness<br>Ra ( $\mu\text{m}$ ) | VDI   | Average<br>VDI | Workpiece<br>total average<br>VDI |
|---------|------------------|--------------------------------------------------------|-------|----------------|-----------------------------------|
| 1       | 1                | 1.46                                                   | 23.29 | 23.52          |                                   |
|         | 2                | 1.45                                                   | 23.23 |                |                                   |
|         | 3                | 1.59                                                   | 24.03 |                |                                   |
| 2       | 1                | 1.68                                                   | 24.51 | 23.81          | 23.60                             |
|         | 2                | 1.39                                                   | 22.86 |                |                                   |
|         | 3                | 1.58                                                   | 23.97 |                |                                   |
| 3       | 1                | 1.55                                                   | 23.81 | 23.48          |                                   |

|   |      |       |
|---|------|-------|
| 2 | 1.44 | 23.17 |
| 3 | 1.49 | 23.46 |

Table S7. Results of EDM test. Electrolytic electrode. Strategy 4.

| Replica | Initial electrode weight (g) | Initial work-piece weight (g) | Final electrode weight (g) | Final workpiece weight (g) | Electrode wear (g) | Workpiece wear (g) | Electrode wear (mm <sup>3</sup> ) | Workpiece wear (mm <sup>3</sup> ) | Process time (min) | Electrode wear rate (%) | Stock removal rate (mm <sup>3</sup> /min) |
|---------|------------------------------|-------------------------------|----------------------------|----------------------------|--------------------|--------------------|-----------------------------------|-----------------------------------|--------------------|-------------------------|-------------------------------------------|
| 1       | 81.2659                      | 87.5608                       | 81.2258                    | 87.4409                    | 0.0401             | 0.1199             | 4.4761                            | 42.5077                           | 95                 | 10.530                  | 0.447                                     |
| 2       | 81.2258                      | 87.4409                       | 81.1846                    | 87.3205                    | 0.0412             | 0.1204             | 4.5988                            | 42.6849                           | 95                 | 10.774                  | 0.449                                     |
| 3       | 81.1846                      | 87.3205                       | 81.1654                    | 87.2655                    | 0.0192             | 0.0550             | 2.1431                            | 19.4989                           | 44                 | 10.991                  | 0.443                                     |

Table S8. Workpiece roughness measurements. Electrolytic electrode. Strategy 4.

| Replica | Measurement | Arithmetical mean roughness Ra (μm) | VDI   | Average VDI | Workpiece total average VDI |
|---------|-------------|-------------------------------------|-------|-------------|-----------------------------|
| 1       | 1           | 1.49                                | 23.46 | 24.54       | 24.92                       |
|         | 2           | 1.76                                | 24.91 |             |                             |
|         | 3           | 1.81                                | 25.15 |             |                             |
| 2       | 1           | 1.89                                | 25.53 | 25.19       | 24.92                       |
|         | 2           | 1.81                                | 25.15 |             |                             |
|         | 3           | 1.75                                | 24.86 |             |                             |
| 3       | 1           | 1.85                                | 25.34 | 25.04       | 24.92                       |
|         | 2           | 1.70                                | 24.61 |             |                             |
|         | 3           | 1.81                                | 25.15 |             |                             |

Table S9. Results of EDM test. Electrolytic electrode. Strategy 5.

| Replica | Initial electrode weight (g) | Initial work-piece weight (g) | Final electrode weight (g) | Final workpiece weight (g) | Electrode wear (g) | Workpiece wear (g) | Electrode wear (mm <sup>3</sup> ) | Workpiece wear (mm <sup>3</sup> ) | Process time (min) | Electrode wear rate (%) | Stock removal rate (mm <sup>3</sup> /min) |
|---------|------------------------------|-------------------------------|----------------------------|----------------------------|--------------------|--------------------|-----------------------------------|-----------------------------------|--------------------|-------------------------|-------------------------------------------|
| 1       | 81.1654                      | 87.2655                       | 81.1628                    | 87.2529                    | 0.0026             | 0.0126             | 0.2902                            | 4.4670                            | 9                  | 6.497                   | 0.496                                     |
| 2       | 81.1628                      | 87.2529                       | 81.1342                    | 87.1341                    | 0.0286             | 0.1188             | 3.1924                            | 42.1177                           | 88                 | 7.580                   | 0.479                                     |
| 3       | 81.1342                      | 87.1341                       | 81.1041                    | 87.0125                    | 0.0301             | 0.1216             | 3.3598                            | 43.1104                           | 93                 | 7.794                   | 0.464                                     |

Table S10. Workpiece roughness measurements. Electrolytic electrode. Strategy 5.

| Replica | Measurement | Arithmetical mean roughness | VDI | Average VDI | Workpiece |
|---------|-------------|-----------------------------|-----|-------------|-----------|
|---------|-------------|-----------------------------|-----|-------------|-----------|

| Ra (μm) |   |      |       | total average<br>VDI |       |
|---------|---|------|-------|----------------------|-------|
| 1       | 1 | 1.43 | 23.11 | 22.90                | 22.62 |
|         | 2 | 1.39 | 22.86 |                      |       |
|         | 3 | 1.37 | 22.73 |                      |       |
| 2       | 1 | 1.34 | 22.54 | 22.21                |       |
|         | 2 | 1.22 | 21.73 |                      |       |
|         | 3 | 1.31 | 22.35 |                      |       |
| 3       | 1 | 1.49 | 23.46 | 22.76                |       |
|         | 2 | 1.21 | 21.66 |                      |       |
|         | 3 | 1.42 | 23.05 |                      |       |

Table S11. Results of EDM test. Electrolytic electrode. Strategy 6.

| Replica | Initial electrode weight (g) | Initial work-piece weight (g) | Final electrode weight (g) | Final workpiece weight (g) | Electrode wear (g) | Workpiece wear (g) | Electrode wear ( $\text{mm}^3$ ) | Workpiece wear ( $\text{mm}^3$ ) | Process time (min) | Electrode wear rate (%) | Stock removal rate ( $\text{mm}^3/\text{min}$ ) |
|---------|------------------------------|-------------------------------|----------------------------|----------------------------|--------------------|--------------------|----------------------------------|----------------------------------|--------------------|-------------------------|-------------------------------------------------|
| 1       | 81.1041                      | 87.5725                       | 81.0716                    | 87.4763                    | 0.0325             | 0.0962             | 3.6277                           | 34.1054                          | 58                 | 10.637                  | 0.588                                           |
| 2       | 81.0716                      | 87.4763                       | 81.0330                    | 87.3647                    | 0.0386             | 0.1116             | 4.3086                           | 39.5651                          | 67                 | 10.890                  | 0.591                                           |
| 3       | 81.0330                      | 87.3647                       | 80.9953                    | 87.2526                    | 0.0377             | 0.1121             | 4.2082                           | 39.7424                          | 67                 | 10.589                  | 0.593                                           |

Table S12. Workpiece roughness measurements. Electrolytic electrode. Strategy 6.

| Replica | Measure-<br>ment | Arithmetical<br>mean roughness<br>Ra (μm) | VDI   | Average<br>VDI | Workpiece<br>total average<br>VDI |
|---------|------------------|-------------------------------------------|-------|----------------|-----------------------------------|
| 1       | 1                | 1.88                                      | 25.48 | 25.15          | 25.01                             |
|         | 2                | 1.74                                      | 24.81 |                |                                   |
|         | 3                | 1.81                                      | 25.15 |                |                                   |
| 2       | 1                | 1.92                                      | 25.67 | 25.06          |                                   |
|         | 2                | 1.70                                      | 24.61 |                |                                   |
|         | 3                | 1.75                                      | 24.86 |                |                                   |
| 3       | 1                | 1.73                                      | 24.76 | 24.83          |                                   |
|         | 2                | 1.80                                      | 25.11 |                |                                   |
|         | 3                | 1.70                                      | 24.61 |                |                                   |

Table S13. Results of EDM test. Electrolytic electrode. Strategy 7.

| Replica | Initial electrode weight (g) | Initial work-piece weight (g) | Final electrode weight (g) | Final workpiece weight (g) | Electrode wear (g) | Workpiece wear (g) | Electrode wear (mm <sup>3</sup> ) | Workpiece wear (mm <sup>3</sup> ) | Process time (min) | Electrode wear rate (%) | Stock removal rate (mm <sup>3</sup> /min) |
|---------|------------------------------|-------------------------------|----------------------------|----------------------------|--------------------|--------------------|-----------------------------------|-----------------------------------|--------------------|-------------------------|-------------------------------------------|
| 1       | 80.9953                      | 87.2526                       | 80.9766                    | 87.1387                    | 0.0187             | 0.1139             | 2.0873                            | 40.3805                           | 94                 | 5.169                   | 0.430                                     |
| 2       | 80.9766                      | 87.1387                       | 80.9587                    | 87.0347                    | 0.0179             | 0.1040             | 1.9980                            | 36.8707                           | 104                | 5.419                   | 0.355                                     |
| 3       | 80.9587                      | 87.0347                       | 80.9284                    | 86.9458                    | 0.0303             | 0.0889             | 3.3822                            | 31.5174                           | 80                 | 10.731                  | 0.394                                     |

Table S14. Workpiece roughness measurements. Electrolytic electrode. Strategy 7.

| Replica | Measurement | Arithmetical mean roughness Ra (μm) | VDI   | Average VDI | Workpiece total average VDI |
|---------|-------------|-------------------------------------|-------|-------------|-----------------------------|
| 1       | 1           | 1.46                                | 23.29 | 23.33       | 23.95                       |
|         | 2           | 1.87                                | 23.75 |             |                             |
|         | 3           | 1.75                                | 22.92 |             |                             |
| 2       | 1           | 1.54                                | 25.44 | 23.94       | 23.95                       |
|         | 2           | 1.37                                | 22.73 |             |                             |
|         | 3           | 1.68                                | 23.41 |             |                             |
| 3       | 1           | 1.40                                | 24.86 | 24.59       |                             |
|         | 2           | 1.48                                | 24.51 |             |                             |
|         | 3           | 1.66                                | 24.40 |             |                             |

Table S15. Results of EDM test. Electrolytic electrode. Strategy 8.

| Replica | Initial electrode weight (g) | Initial work-piece weight (g) | Final electrode weight (g) | Final workpiece weight (g) | Electrode wear (g) | Workpiece wear (g) | Electrode wear (mm <sup>3</sup> ) | Workpiece wear (mm <sup>3</sup> ) | Process time (min) | Electrode wear rate (%) | Stock removal rate (mm <sup>3</sup> /min) |
|---------|------------------------------|-------------------------------|----------------------------|----------------------------|--------------------|--------------------|-----------------------------------|-----------------------------------|--------------------|-------------------------|-------------------------------------------|
| 1       | 80.9278                      | 87.5597                       | 80.8956                    | 87.4628                    | 0.0322             | 0.0969             | 3.5942                            | 34.3536                           | 88                 | 10.462                  | 0.390                                     |
| 2       | 80.8956                      | 87.4628                       | 80.8736                    | 87.3958                    | 0.0220             | 0.0670             | 2.4557                            | 23.7532                           | 61                 | 10.338                  | 0.389                                     |
| 3       | 80.8736                      | 87.3958                       | 80.8432                    | 87.3046                    | 0.0304             | 0.0912             | 3.3933                            | 32.3328                           | 82                 | 10.495                  | 0.394                                     |

Table S16. Workpiece roughness measurements. Electrolytic electrode. Strategy 8.

| Replica | Measurement | Arithmetical mean roughness | VDI | Average VDI | Workpiece |
|---------|-------------|-----------------------------|-----|-------------|-----------|
|---------|-------------|-----------------------------|-----|-------------|-----------|

| Ra (μm) |   |      |       | total average<br>VDI |       |
|---------|---|------|-------|----------------------|-------|
| 1       | 1 | 1.71 | 24.66 | 24.38                | 24.58 |
|         | 2 | 1.64 | 24.30 |                      |       |
|         | 3 | 1.62 | 24.19 |                      |       |
| 2       | 1 | 1.65 | 24.35 | 24.59                |       |
|         | 2 | 1.72 | 24.71 |                      |       |
|         | 3 | 1.72 | 24.71 |                      |       |
| 3       | 1 | 1.69 | 24.56 | 24.76                |       |
|         | 2 | 1.74 | 24.81 |                      |       |
|         | 3 | 1.76 | 24.91 |                      |       |

Table S17. Results of EDM test. Electrolytic electrode. Strategy 9.

| Replica | Initial electrode weight (g) | Initial work-piece weight (g) | Final electrode weight (g) | Final workpiece weight (g) | Electrode wear (g) | Workpiece wear (g) | Electrode wear ( $\text{mm}^3$ ) | Workpiece wear ( $\text{mm}^3$ ) | Process time (min) | Electrode wear rate (%) | Stock removal rate ( $\text{mm}^3/\text{min}$ ) |
|---------|------------------------------|-------------------------------|----------------------------|----------------------------|--------------------|--------------------|----------------------------------|----------------------------------|--------------------|-------------------------|-------------------------------------------------|
| 1       | 80.2560                      | 87.5573                       | 80.2385                    | 87.4536                    | 0.0175             | 0.1037             | 1.9534                           | 36.7644                          | 57                 | 5.313                   | 0.645                                           |
| 2       | 80.2385                      | 87.4536                       | 80.2241                    | 87.3730                    | 0.0144             | 0.0806             | 1.6074                           | 28.5748                          | 45                 | 5.625                   | 0.635                                           |
| 3       | 80.2241                      | 87.3730                       | 80.2061                    | 87.2747                    | 0.0180             | 0.0983             | 2.0092                           | 34.8499                          | 53                 | 5.765                   | 0.658                                           |

Table S18. Workpiece roughness measurements. Electrolytic electrode. Strategy 9.

| Replica | Measure-<br>ment | Arithmetical<br>mean roughness<br>Ra (μm) | VDI   | Average<br>VDI | Workpiece<br>total average<br>VDI |
|---------|------------------|-------------------------------------------|-------|----------------|-----------------------------------|
| 1       | 1                | 1.50                                      | 23.52 | 23.50          | 23.37                             |
|         | 2                | 1.50                                      | 23.52 |                |                                   |
|         | 3                | 1.49                                      | 23.46 |                |                                   |
| 2       | 1                | 1.44                                      | 23.17 | 23.27          |                                   |
|         | 2                | 1.50                                      | 23.52 |                |                                   |
|         | 3                | 1.43                                      | 23.11 |                |                                   |
| 3       | 1                | 1.41                                      | 22.98 | 23.35          |                                   |
|         | 2                | 1.49                                      | 23.46 |                |                                   |
|         | 3                | 1.51                                      | 23.58 |                |                                   |

Table S19. Results of EDM test. Electrolytic electrode. Strategy 10.

| Replica | Initial electrode weight (g) | Initial work-piece weight (g) | Final electrode weight (g) | Final workpiece weight (g) | Electrode wear (g) | Workpiece wear (g) | Electrode wear (mm <sup>3</sup> ) | Workpiece wear (mm <sup>3</sup> ) | Process time (min) | Electrode wear rate (%) | Stock removal rate (mm <sup>3</sup> /min) |
|---------|------------------------------|-------------------------------|----------------------------|----------------------------|--------------------|--------------------|-----------------------------------|-----------------------------------|--------------------|-------------------------|-------------------------------------------|
| 1       | 80.2061                      | 87.2747                       | 80.1742                    | 87.1705                    | 0.0319             | 0.1042             | 3.5608                            | 36.9416                           | 45                 | 9.639                   | 0.821                                     |
| 2       | 80.1742                      | 87.1705                       | 80.1425                    | 87.0692                    | 0.0317             | 0.1013             | 3.5384                            | 35.9135                           | 45                 | 9.853                   | 0.798                                     |
| 3       | 80.1425                      | 87.0692                       | 80.1116                    | 86.9696                    | 0.0309             | 0.0996             | 3.4491                            | 35.3108                           | 43                 | 9.768                   | 0.821                                     |

Table S20. Workpiece roughness measurements. Electrolytic electrode. Strategy 10.

| Replica | Measure-ment | Arithmetical mean roughness Ra (μm) | VDI   | Average VDI | Workpiece total average VDI |
|---------|--------------|-------------------------------------|-------|-------------|-----------------------------|
| 1       | 1            | 1.88                                | 25.48 | 25.37       | 25.41                       |
|         | 2            | 1.85                                | 25.34 |             |                             |
|         | 3            | 1.84                                | 25.30 |             |                             |
| 2       | 1            | 1.84                                | 25.30 | 25.33       | 25.41                       |
|         | 2            | 1.82                                | 25.20 |             |                             |
|         | 3            | 1.88                                | 25.48 |             |                             |
| 3       | 1            | 1.88                                | 25.48 | 25.51       | 25.41                       |
|         | 2            | 1.97                                | 25.89 |             |                             |
|         | 3            | 1.81                                | 25.15 |             |                             |

Table S21. Results of EDM test. Electrolytic electrode. Strategy 11.

| Replica | Initial electrode weight (g) | Initial work-piece weight (g) | Final electrode weight (g) | Final workpiece weight (g) | Electrode wear (g) | Workpiece wear (g) | Electrode wear (mm <sup>3</sup> ) | Workpiece wear (mm <sup>3</sup> ) | Process time (min) | Electrode wear rate (%) | Stock removal rate (mm <sup>3</sup> /min) |
|---------|------------------------------|-------------------------------|----------------------------|----------------------------|--------------------|--------------------|-----------------------------------|-----------------------------------|--------------------|-------------------------|-------------------------------------------|
| 1       | 80.6963                      | 87.2783                       | 80.6780                    | 87.1814                    | 0.0183             | 0.0969             | 2.0427                            | 34.3536                           | 79                 | 5.946                   | 0.435                                     |
| 2       | 80.6780                      | 87.1814                       | 80.6598                    | 87.0762                    | 0.0182             | 0.1052             | 2.0315                            | 37.2961                           | 83                 | 5.447                   | 0.449                                     |
| 3       | 80.6598                      | 87.0762                       | 80.6417                    | 86.9804                    | 0.0181             | 0.0958             | 2.0204                            | 33.9636                           | 77                 | 5.949                   | 0.441                                     |

Table S22. Workpiece roughness measurements. Electrolytic electrode. Strategy 11.

| Replica | Measure-ment | Arithmetical mean roughness Ra (μm) | VDI   | Average VDI | Workpiece total average VDI |
|---------|--------------|-------------------------------------|-------|-------------|-----------------------------|
| 1       | 1            | 1.40                                | 22.92 | 23.11       | 23.25                       |

|   |   |      |       |       |
|---|---|------|-------|-------|
|   | 2 | 1.43 | 23.11 |       |
|   | 3 | 1.46 | 23.29 |       |
|   | 1 | 1.37 | 22.73 |       |
| 2 | 2 | 1.56 | 23.86 | 23.25 |
|   | 3 | 1.43 | 23.11 |       |
|   | 1 | 1.42 | 23.05 |       |
| 3 | 2 | 1.49 | 23.46 | 23.41 |
|   | 3 | 1.53 | 23.69 |       |

Table S23. Results of EDM test. Electrolytic electrode. Strategy 12.

| Replica | Initial electrode weight (g) | Initial work-piece weight (g) | Final electrode weight (g) | Final workpiece weight (g) | Electrode wear (g) | Workpiece wear (g) | Electrode wear (mm <sup>3</sup> ) | Workpiece wear (mm <sup>3</sup> ) | Process time (min) | Electrode wear rate (%) | Stock removal rate (mm <sup>3</sup> /min) |
|---------|------------------------------|-------------------------------|----------------------------|----------------------------|--------------------|--------------------|-----------------------------------|-----------------------------------|--------------------|-------------------------|-------------------------------------------|
| 1       | 80.6417                      | 87.5638                       | 80.6052                    | 87.4465                    | 0.0365             | 0.1173             | 4.0742                            | 41.5859                           | 72                 | 9.797                   | 0.578                                     |
| 2       | 80.6052                      | 87.4465                       | 80.5829                    | 87.3754                    | 0.0223             | 0.0711             | 2.4892                            | 25.2068                           | 45                 | 9.875                   | 0.560                                     |
| 3       | 80.5829                      | 87.3754                       | 80.5469                    | 87.2635                    | 0.0360             | 0.1119             | 4.0184                            | 39.6715                           | 70                 | 10.129                  | 0.567                                     |

Table S24. Workpiece roughness measurements. Electrolytic electrode. Strategy 12.

| Replica | Measure-ment | Arithmetical mean roughness Ra (μm) | VDI   | Average VDI | Workpiece total average VDI |
|---------|--------------|-------------------------------------|-------|-------------|-----------------------------|
| 1       | 1            | 1.87                                | 25.44 | 25.44       | 25.27                       |
|         | 2            | 1.89                                | 25.53 |             |                             |
|         | 3            | 1.85                                | 25.34 |             |                             |
| 2       | 1            | 1.85                                | 25.34 | 25.31       | 25.27                       |
|         | 2            | 1.88                                | 25.48 |             |                             |
|         | 3            | 1.80                                | 25.11 |             |                             |
| 3       | 1            | 1.69                                | 24.56 | 25.06       |                             |
|         | 2            | 1.82                                | 25.20 |             |                             |
|         | 3            | 1.86                                | 25.39 |             |                             |

Table S25. Results of EDM test. Electrolytic electrode. Strategy 13.



| Replica | Initial electrode weight (g) | Initial work-piece weight (g) | Final electrode weight (g) | Final workpiece weight (g) | Electrode wear (g) | Workpiece wear (g) | Electrode wear (mm <sup>3</sup> ) | Workpiece wear (mm <sup>3</sup> ) | Process time (min) | Electrode wear rate (%) | Stock removal rate (mm <sup>3</sup> /min) |
|---------|------------------------------|-------------------------------|----------------------------|----------------------------|--------------------|--------------------|-----------------------------------|-----------------------------------|--------------------|-------------------------|-------------------------------------------|
| 1       | 80.5469                      | 87.2635                       | 80.5238                    | 87.1545                    | 0.0231             | 0.1090             | 2.5785                            | 38.6433                           | 61                 | 6.672                   | 0.633                                     |
| 2       | 80.5238                      | 87.1545                       | 80.5060                    | 87.0724                    | 0.0178             | 0.0821             | 1.9869                            | 29.1066                           | 47                 | 6.826                   | 0.619                                     |
| 3       | 80.5060                      | 87.0724                       | 80.4941                    | 87.0020                    | 0.0119             | 0.0704             | 1.3283                            | 24.9586                           | 40                 | 5.322                   | 0.624                                     |

Table S26. Workpiece roughness measurements. Electrolytic electrode. Strategy 13.

| Replica | Measure-ment | Arithmetical mean roughness Ra (μm) | VDI   | Average VDI | Workpiece total average VDI |
|---------|--------------|-------------------------------------|-------|-------------|-----------------------------|
| 1       | 1            | 1.43                                | 23.11 | 23.23       | 23.33                       |
|         | 2            | 1.43                                | 23.11 |             |                             |
|         | 3            | 1.49                                | 23.46 |             |                             |
| 2       | 1            | 1.47                                | 23.35 | 23.25       | 23.33                       |
|         | 2            | 1.45                                | 23.23 |             |                             |
|         | 3            | 1.44                                | 23.17 |             |                             |
| 3       | 1            | 1.50                                | 23.52 | 23.50       |                             |
|         | 2            | 1.55                                | 23.81 |             |                             |
|         | 3            | 1.44                                | 23.17 |             |                             |

Table S27. Results of EDM test. Electrolytic electrode. Strategy 14.

| Replica | Initial electrode weight (g) | Initial work-piece weight (g) | Final electrode weight (g) | Final workpiece weight (g) | Electrode wear (g) | Workpiece wear (g) | Electrode wear (mm <sup>3</sup> ) | Workpiece wear (mm <sup>3</sup> ) | Process time (min) | Electrode wear rate (%) | Stock removal rate (mm <sup>3</sup> /min) |
|---------|------------------------------|-------------------------------|----------------------------|----------------------------|--------------------|--------------------|-----------------------------------|-----------------------------------|--------------------|-------------------------|-------------------------------------------|
| 1       | 80.4941                      | 87.5665                       | 80.4588                    | 87.4525                    | 0.0353             | 0.1140             | 3.9403                            | 40.4160                           | 49                 | 9.749                   | 0.825                                     |
| 2       | 80.4588                      | 87.4525                       | 80.4428                    | 87.4000                    | 0.0160             | 0.0525             | 1.7860                            | 18.6126                           | 23                 | 9.595                   | 0.809                                     |
| 3       | 80.4428                      | 87.4000                       | 80.4113                    | 87.2993                    | 0.0315             | 0.1007             | 3.5161                            | 35.7008                           | 45                 | 9.849                   | 0.793                                     |

Table S28. Workpiece roughness measurements. Electrolytic electrode. Strategy 14.

| Replica | Measure-ment | Arithmetical mean roughness Ra (μm) | VDI   | Average VDI | Workpiece total average VDI |
|---------|--------------|-------------------------------------|-------|-------------|-----------------------------|
| 1       | 1            | 1.88                                | 25.48 | 25.39       | 25.16                       |

|   |   |      |       |       |
|---|---|------|-------|-------|
|   | 2 | 1.79 | 25.06 |       |
|   | 3 | 1.91 | 25.62 |       |
|   | 1 | 1.64 | 24.30 |       |
| 2 | 2 | 1.79 | 25.06 | 24.99 |
|   | 3 | 1.90 | 25.58 |       |
|   | 1 | 1.85 | 25.34 |       |
| 3 | 2 | 1.67 | 24.45 | 25.11 |
|   | 3 | 1.88 | 25.48 |       |
|   | 1 | 1.64 | 24.30 |       |

Table S29. Results of EDM test. Electrolytic electrode. Strategy 15.

| Replica | Initial electrode weight (g) | Initial work-piece weight (g) | Final electrode weight (g) | Final workpiece weight (g) | Electrode wear (g) | Workpiece wear (g) | Electrode wear (mm <sup>3</sup> ) | Workpiece wear (mm <sup>3</sup> ) | Process time (min) | Electrode wear rate (%) | Stock removal rate (mm <sup>3</sup> /min) |
|---------|------------------------------|-------------------------------|----------------------------|----------------------------|--------------------|--------------------|-----------------------------------|-----------------------------------|--------------------|-------------------------|-------------------------------------------|
| 1       | 80.4113                      | 87.2993                       | 80.3934                    | 87.1940                    | 0.0179             | 0.1053             | 1.9980                            | 37.3316                           | 89                 | 5.352                   | 0.419                                     |
| 2       | 80.3934                      | 87.1940                       | 80.3740                    | 87.0904                    | 0.0194             | 0.1036             | 2.1655                            | 36.7289                           | 89                 | 5.896                   | 0.413                                     |
| 3       | 80.3740                      | 87.0904                       | 80.3555                    | 86.9814                    | 0.0185             | 0.1090             | 2.0650                            | 38.6433                           | 92                 | 5.344                   | 0.420                                     |

Table S30. Workpiece roughness measurements. Electrolytic electrode. Strategy 15.

| Replica | Measurement | Arithmetical mean roughness Ra (μm) | VDI   | Average VDI | Workpiece total average VDI |
|---------|-------------|-------------------------------------|-------|-------------|-----------------------------|
| 1       | 1           | 1.43                                | 23.11 | 23.27       | 23.13                       |
|         | 2           | 1.45                                | 23.23 |             |                             |
|         | 3           | 1.49                                | 23.46 |             |                             |
| 2       | 1           | 1.42                                | 23.05 | 22.96       | 23.13                       |
|         | 2           | 1.43                                | 23.11 |             |                             |
|         | 3           | 1.37                                | 22.73 |             |                             |
| 3       | 1           | 1.42                                | 23.05 | 23.15       | 23.13                       |
|         | 2           | 1.45                                | 23.23 |             |                             |
|         | 3           | 1.44                                | 23.17 |             |                             |

Table S31. Results of EDM test. Electrolytic electrode. Strategy 16.

| Replica | Initial electrode weight (g) | Initial work-piece weight (g) | Final electrode weight (g) | Final workpiece weight (g) | Electrode wear (g) | Workpiece wear (g) | Electrode wear (mm <sup>3</sup> ) | Workpiece wear (mm <sup>3</sup> ) | Process time (min) | Electrode wear rate (%) | Stock removal rate (mm <sup>3</sup> /min) |
|---------|------------------------------|-------------------------------|----------------------------|----------------------------|--------------------|--------------------|-----------------------------------|-----------------------------------|--------------------|-------------------------|-------------------------------------------|
| 1       | 80.3555                      | 87.5921                       | 80.3230                    | 87.5291                    | 0.0325             | 0.0630             | 3.6277                            | 22.3351                           | 65                 | 16.242                  | 0.344                                     |
| 2       | 80.3230                      | 87.5291                       | 80.2885                    | 87.4241                    | 0.0345             | 0.1050             | 3.8510                            | 37.2252                           | 68                 | 10.345                  | 0.547                                     |
| 3       | 80.2885                      | 87.4241                       | 80.2559                    | 87.3210                    | 0.0326             | 0.1031             | 3.6389                            | 36.5516                           | 66                 | 9.955                   | 0.554                                     |

Table S32. Workpiece roughness measurements. Electrolytic electrode. Strategy 16.

| Replica | Measure-ment | Arithmetical mean roughness Ra (μm) | VDI   | Average VDI | Workpiece total average VDI |
|---------|--------------|-------------------------------------|-------|-------------|-----------------------------|
| 1       | 1            | 1.90                                | 25.58 | 25.44       | 25.47                       |
|         | 2            | 1.91                                | 25.62 |             |                             |
|         | 3            | 1.80                                | 25.11 |             |                             |
| 2       | 1            | 2.01                                | 26.06 | 25.54       | 25.47                       |
|         | 2            | 1.83                                | 25.25 |             |                             |
|         | 3            | 1.84                                | 25.30 |             |                             |
| 3       | 1            | 1.85                                | 25.34 | 25.44       | 25.47                       |
|         | 2            | 1.87                                | 25.44 |             |                             |
|         | 3            | 1.89                                | 25.53 |             |                             |

Table S33. Results of EDM test. Electrolytic electrode. Strategy 17.

| Replica | Initial electrode weight (g) | Initial work-piece weight (g) | Final electrode weight (g) | Final workpiece weight (g) | Electrode wear (g) | Workpiece wear (g) | Electrode wear (mm <sup>3</sup> ) | Workpiece wear (mm <sup>3</sup> ) | Process time (min) | Electrode wear rate (%) | Stock removal rate (mm <sup>3</sup> /min) |
|---------|------------------------------|-------------------------------|----------------------------|----------------------------|--------------------|--------------------|-----------------------------------|-----------------------------------|--------------------|-------------------------|-------------------------------------------|
| 1       | 80.1116                      | 88.4131                       | 80.1036                    | 88.3857                    | 0.0080             | 0.0274             | 0.8930                            | 9.7140                            | 180                | 9.193                   | 0.054                                     |
| 2       | 80.1036                      | 88.3857                       | 80.0926                    | 88.3700                    | 0.0110             | 0.0157             | 1.2278                            | 5.5661                            | 130                | 22.060                  | 0.043                                     |
| 3       | 80.0926                      | 88.3700                       | 80.0849                    | 88.3544                    | 0.0077             | 0.0156             | 0.8595                            | 5.5306                            | 130                | 15.541                  | 0.043                                     |

Table S34. Workpiece roughness measurements. Electrolytic electrode. Strategy 17.

| Replica | Measure-ment | Arithmetical mean roughness Ra (μm) | VDI   | Average VDI | Workpiece total average VDI |
|---------|--------------|-------------------------------------|-------|-------------|-----------------------------|
| 1       | 1            | 1.98                                | 25.93 | 24.37       | 23.65                       |
|         | 2            | 0.57                                | 15.12 |             |                             |

|   |   |      |       |       |
|---|---|------|-------|-------|
|   | 3 | 2.41 | 27.64 |       |
|   | 1 | 1.55 | 23.81 |       |
| 2 | 2 | 0.57 | 15.12 | 22.28 |
|   | 3 | 1.78 | 25.01 |       |
|   | 1 | 1.82 | 25.20 |       |
| 3 | 2 | 0.57 | 15.12 | 24.31 |
|   | 3 | 2.54 | 28.10 |       |

Table S35. Results of EDM test. Electrolytic electrode. Strategy 18.

| Replica | Initial electrode weight (g) | Initial work-piece weight (g) | Final electrode weight (g) | Final workpiece weight (g) | Electrode wear (g) | Workpiece wear (g) | Electrode wear (mm <sup>3</sup> ) | Workpiece wear (mm <sup>3</sup> ) | Process time (min) | Electrode wear rate (%) | Stock removal rate (mm <sup>3</sup> /min) |
|---------|------------------------------|-------------------------------|----------------------------|----------------------------|--------------------|--------------------|-----------------------------------|-----------------------------------|--------------------|-------------------------|-------------------------------------------|
| 1       | 79.9277                      | 83.0379                       | 79.9082                    | 82.9144                    | 0.0195             | 0.1235             | 2.1766                            | 43.7840                           | 36                 | 4.971                   | 1.216                                     |
| 2       | 79.9082                      | 82.9144                       | 79.8862                    | 82.7753                    | 0.0220             | 0.1391             | 2.4557                            | 49.3146                           | 36                 | 4.980                   | 1.370                                     |
| 3       | 79.8862                      | 82.7753                       | 79.8659                    | 82.6497                    | 0.0203             | 0.1256             | 2.2659                            | 44.5285                           | 32                 | 5.089                   | 1.392                                     |

Table S36. Workpiece roughness measurements. Electrolytic electrode. Strategy 18.

| Replica | Measure-ment | Arithmetical mean roughness Ra (μm) | VDI   | Average VDI | Workpiece total average VDI |
|---------|--------------|-------------------------------------|-------|-------------|-----------------------------|
|         | 1            | 1.94                                | 25.76 |             |                             |
| 1       | 2            | 1.89                                | 25.53 | 25.59       |                             |
|         | 3            | 1.88                                | 25.48 |             |                             |
|         | 1            | 1.71                                | 24.66 |             |                             |
| 2       | 2            | 1.80                                | 25.11 | 25.22       | 25.55                       |
|         | 3            | 1.96                                | 25.85 |             |                             |
|         | 1            | 2.05                                | 26.24 |             |                             |
| 3       | 2            | 1.88                                | 25.48 | 25.83       |                             |
|         | 3            | 1.94                                | 25.76 |             |                             |

Table S37. Results of EDM test. Electrolytic electrode. Strategy 19.

| Replica | Initial electrode weight (g) | Initial work-piece weight (g) | Final electrode weight (g) | Final workpiece weight (g) | Electrode wear (g) | Workpiece wear (g) | Electrode wear (mm <sup>3</sup> ) | Workpiece wear (mm <sup>3</sup> ) | Process time (min) | Electrode wear rate (%) | Stock removal rate (mm <sup>3</sup> /min) |
|---------|------------------------------|-------------------------------|----------------------------|----------------------------|--------------------|--------------------|-----------------------------------|-----------------------------------|--------------------|-------------------------|-------------------------------------------|
|---------|------------------------------|-------------------------------|----------------------------|----------------------------|--------------------|--------------------|-----------------------------------|-----------------------------------|--------------------|-------------------------|-------------------------------------------|

|   |         |         |         |         |        |        |        |         |    |       |       |
|---|---------|---------|---------|---------|--------|--------|--------|---------|----|-------|-------|
| 1 | 79.8659 | 82.6497 | 79.8500 | 82.5066 | 0.0159 | 0.1431 | 1.7748 | 50.7327 | 17 | 3.498 | 2.984 |
| 2 | 79.8500 | 82.5066 | 79.8414 | 82.4202 | 0.0086 | 0.0864 | 0.9600 | 30.6311 | 10 | 3.134 | 3.063 |
| 3 | 79.8414 | 82.4202 | 79.8258 | 82.2822 | 0.0156 | 0.1380 | 1.7413 | 48.9246 | 16 | 3.559 | 3.058 |

Table S38. Workpiece roughness measurements. Electrolytic electrode. Strategy 19.

| Replica | Measure-<br>ment | Arithmetical<br>mean roughness<br>Ra ( $\mu\text{m}$ ) | VDI   | Average<br>VDI | Workpiece<br>total average<br>VDI |
|---------|------------------|--------------------------------------------------------|-------|----------------|-----------------------------------|
| 1       | 1                | 2.54                                                   | 28.10 | 27.80          | 27.48                             |
|         | 2                | 2.40                                                   | 27.60 |                |                                   |
|         | 3                | 2.42                                                   | 27.68 |                |                                   |
| 2       | 1                | 2.43                                                   | 27.71 | 27.65          | 27.48                             |
|         | 2                | 2.52                                                   | 28.03 |                |                                   |
|         | 3                | 2.29                                                   | 27.20 |                |                                   |
| 3       | 1                | 2.23                                                   | 26.97 | 27.00          | 27.48                             |
|         | 2                | 2.15                                                   | 26.65 |                |                                   |
|         | 3                | 2.34                                                   | 27.38 |                |                                   |

Table S39. Results of EDM test. ADAM electrode. Strategy 3.

| Replica | Initial electrode<br>weight (g) | Initial work-<br>piece weight (g) | Final electrode<br>weight (g) | Final workpiece<br>weight (g) | Electrode<br>wear (g) | Workpiece<br>wear (g) | Electrode<br>wear<br>( $\text{mm}^3$ ) | Workpiece<br>wear<br>( $\text{mm}^3$ ) | Process<br>time<br>(min) | Electrode<br>wear<br>rate (%) | Stock<br>removal rate<br>( $\text{mm}^3/\text{min}$ ) |
|---------|---------------------------------|-----------------------------------|-------------------------------|-------------------------------|-----------------------|-----------------------|----------------------------------------|----------------------------------------|--------------------------|-------------------------------|-------------------------------------------------------|
| 1       | 36.4847                         | 88.6637                           | 36.4523                       | 88.5494                       | 0.0324                | 0.1143                | 3.8029                                 | 40.5223                                | 114                      | 28.346                        | 9.385                                                 |
| 2       | 36.4773                         | 88.5494                           | 36.4313                       | 88.4162                       | 0.0460                | 0.1332                | 5.3992                                 | 47.2229                                | 132                      | 34.535                        | 11.433                                                |
| 3       | 36.4313                         | 88.4162                           | 36.4004                       | 88.2926                       | 0.0309                | 0.1236                | 3.6268                                 | 43.8194                                | 123                      | 25.000                        | 8.277                                                 |

Table S40. Workpiece roughness measurements. ADAM electrode. Strategy 3.

| Replica | Measure-<br>ment | Arithmetical<br>mean roughness<br>Ra ( $\mu\text{m}$ ) | VDI   | Average<br>VDI | Workpiece<br>total average<br>VDI |
|---------|------------------|--------------------------------------------------------|-------|----------------|-----------------------------------|
| 1       | 1                | 1.46                                                   | 23.29 | 23.12          | 22.96                             |
|         | 2                | 1.46                                                   | 23.29 |                |                                   |
|         | 3                | 1.38                                                   | 22.80 |                |                                   |
| 2       | 1                | 1.47                                                   | 23.35 | 23.00          |                                   |

|   |   |      |       |       |
|---|---|------|-------|-------|
|   | 2 | 1.34 | 22.54 |       |
|   | 3 | 1.43 | 23.11 |       |
|   | 1 | 1.43 | 23.11 |       |
| 3 | 2 | 1.35 | 22.61 | 22.75 |
|   | 3 | 1.34 | 22.54 |       |

Table S41. Results of EDM test. ADAM electrode. Strategy 15.

| Replica | Initial electrode weight (g) | Initial work-piece weight (g) | Final electrode weight (g) | Final workpiece weight (g) | Electrode wear (g) | Workpiece wear (g) | Electrode wear (mm <sup>3</sup> ) | Workpiece wear (mm <sup>3</sup> ) | Process time (min) | Electrode wear rate (%) | Stock removal rate (mm <sup>3</sup> /min) |
|---------|------------------------------|-------------------------------|----------------------------|----------------------------|--------------------|--------------------|-----------------------------------|-----------------------------------|--------------------|-------------------------|-------------------------------------------|
| 1       | 36.4464                      | 87.7682                       | 36.4004                    | 87.6504                    | 0.0460             | 0.1178             | 5.3992                            | 41.7632                           | 92                 | 39.049                  | 12.928                                    |
| 2       | 36.4004                      | 87.6504                       | 36.3719                    | 87.5342                    | 0.0285             | 0.1162             | 3.3451                            | 41.1959                           | 89                 | 24.527                  | 8.120                                     |
| 3       | 36.3719                      | 87.5342                       | 36.3550                    | 87.4591                    | 0.0169             | 0.0751             | 1.9836                            | 26.6249                           | 60                 | 22.503                  | 7.450                                     |

Table S42. Workpiece roughness measurements. ADAM electrode. Strategy 15.

| Replica | Measurement | Arithmetical mean roughness Ra (μm) | VDI   | Average VDI | Workpiece total average VDI |
|---------|-------------|-------------------------------------|-------|-------------|-----------------------------|
|         | 1           | 1.53                                | 23.69 |             |                             |
| 1       | 2           | 1.60                                | 24.08 | 24.02       |                             |
|         | 3           | 1.64                                | 24.30 |             |                             |
|         | 1           | 1.47                                | 23.35 |             |                             |
| 2       | 2           | 1.40                                | 22.92 | 23.34       | 23.76                       |
|         | 3           | 1.54                                | 23.75 |             |                             |
|         | 1           | 1.56                                | 23.86 |             |                             |
| 3       | 2           | 1.63                                | 24.24 | 23.88       |                             |
|         | 3           | 1.50                                | 23.52 |             |                             |

Table S43. Results of EDM test. ADAM electrode. Strategy 9.

| Replica | Initial electrode weight (g) | Initial work-piece weight (g) | Final electrode weight (g) | Final workpiece weight (g) | Electrode wear (g) | Workpiece wear (g) | Electrode wear (mm <sup>3</sup> ) | Workpiece wear (mm <sup>3</sup> ) | Process time (min) | Electrode wear rate (%) | Stock removal rate (mm <sup>3</sup> /min) |
|---------|------------------------------|-------------------------------|----------------------------|----------------------------|--------------------|--------------------|-----------------------------------|-----------------------------------|--------------------|-------------------------|-------------------------------------------|
| 1       | 36.3837                      | 87.4583                       | 36.3316                    | 87.3391                    | 0.0521             | 0.1192             | 6.1152                            | 42.2595                           | 61                 | 43.708                  | 14.471                                    |
| 2       | 36.3316                      | 87.3391                       | 36.3168                    | 87.2894                    | 0.0148             | 0.0497             | 1.7371                            | 17.6199                           | 26                 | 29.779                  | 9.859                                     |
| 3       | 36.3168                      | 87.2894                       | 36.3074                    | 87.2598                    | 0.0094             | 0.0296             | 1.1033                            | 10.4940                           | 27                 | 31.757                  | 10.514                                    |

Table S44. Workpiece roughness measurements. ADAM electrode. Strategy 9.

| Replica | Measure-<br>ment | Arithmetical<br>mean roughness<br>Ra ( $\mu\text{m}$ ) | VDI   | Average<br>VDI | Workpiece<br>total average<br>VDI |
|---------|------------------|--------------------------------------------------------|-------|----------------|-----------------------------------|
| 1       | 1                | 1.72                                                   | 24.71 | 24.07          | 24.15                             |
|         | 2                | 1.57                                                   | 23.92 |                |                                   |
|         | 3                | 1.51                                                   | 23.58 |                |                                   |
| 2       | 1                | 1.51                                                   | 23.58 | 23.78          | 24.15                             |
|         | 2                | 1.64                                                   | 24.30 |                |                                   |
|         | 3                | 1.49                                                   | 23.46 |                |                                   |
| 3       | 1                | 1.74                                                   | 24.81 | 24.57          |                                   |
|         | 2                | 1.61                                                   | 24.14 |                |                                   |
|         | 3                | 1.73                                                   | 24.76 |                |                                   |

Table S45. Results of EDM test. ADAM electrode. Strategy 10.

| Replica | Initial electrode<br>weight (g) | Initial work-<br>piece weight (g) | Final electrode<br>weight (g) | Final workpiece<br>weight (g) | Electrode<br>wear (g) | Workpiece<br>wear (g) | Electrode<br>wear<br>( $\text{mm}^3$ ) | Workpiece<br>wear<br>( $\text{mm}^3$ ) | Process<br>time<br>(min) | Electrode<br>wear<br>rate (%) | Stock<br>removal rate<br>( $\text{mm}^3/\text{min}$ ) |
|---------|---------------------------------|-----------------------------------|-------------------------------|-------------------------------|-----------------------|-----------------------|----------------------------------------|----------------------------------------|--------------------------|-------------------------------|-------------------------------------------------------|
| 1       | 36.7027                         | 90.1499                           | 36.6291                       | 90.0153                       | 0.0736                | 0.1346                | 8.6387                                 | 47.7192                                | 56                       | 54.681                        | 18.103                                                |
| 2       | 36.6291                         | 90.0153                           | 36.5792                       | 89.8887                       | 0.0499                | 0.1266                | 5.8569                                 | 44.8830                                | 52                       | 39.415                        | 13.049                                                |
| 3       | 36.6155                         | 89.8887                           | 36.5453                       | 89.7614                       | 0.0702                | 0.1273                | 8.2396                                 | 45.1312                                | 53                       | 55.145                        | 18.257                                                |

Table S46. Workpiece roughness measurements. ADAM electrode. Strategy 10.

| Replica | Measure-<br>ment | Arithmetical<br>mean roughness<br>Ra ( $\mu\text{m}$ ) | VDI   | Average<br>VDI | Workpiece<br>total average<br>VDI |
|---------|------------------|--------------------------------------------------------|-------|----------------|-----------------------------------|
| 1       | 1                | 1.89                                                   | 25.53 | 25.50          | 25.75                             |
|         | 2                | 1.90                                                   | 25.58 |                |                                   |
|         | 3                | 1.86                                                   | 25.39 |                |                                   |
| 2       | 1                | 1.86                                                   | 25.39 | 25.59          |                                   |
|         | 2                | 1.90                                                   | 25.58 |                |                                   |
|         | 3                | 1.95                                                   | 25.80 |                |                                   |
| 3       | 1                | 1.95                                                   | 25.80 | 26.16          |                                   |

|   |      |       |
|---|------|-------|
| 2 | 2.00 | 26.02 |
| 3 | 2.15 | 26.65 |

Table S47. Results of EDM test. ADAM electrode. Strategy 18.

| Replica | Initial electrode weight (g) | Initial work-piece weight (g) | Final electrode weight (g) | Final workpiece weight (g) | Electrode wear (g) | Workpiece wear (g) | Electrode wear (mm <sup>3</sup> ) | Workpiece wear (mm <sup>3</sup> ) | Process time (min) | Electrode wear rate (%) | Stock removal rate (mm <sup>3</sup> /min) |
|---------|------------------------------|-------------------------------|----------------------------|----------------------------|--------------------|--------------------|-----------------------------------|-----------------------------------|--------------------|-------------------------|-------------------------------------------|
| 1       | 36.7491                      | 87.3815                       | 36.7209                    | 87.2709                    | 0.0282             | 0.1106             | 3.3099                            | 39.2106                           | 27                 | 25.497                  | 8.441                                     |
| 2       | 36.7209                      | 87.2709                       | 36.7201                    | 87.1406                    | 0.0008             | 0.1303             | 0.0939                            | 46.1948                           | 33                 | 0.614                   | 0.203                                     |
| 3       | 36.7201                      | 87.1406                       | 36.6886                    | 87.0097                    | 0.0315             | 0.1309             | 3.6973                            | 46.4075                           | 34                 | 24.064                  | 7.967                                     |

Table S48. Workpiece roughness measurements. ADAM electrode. Strategy 18.

| Replica | Measure-ment | Arithmetical mean roughness Ra (μm) | VDI   | Average VDI | Workpiece total average VDI |
|---------|--------------|-------------------------------------|-------|-------------|-----------------------------|
| 1       | 1            | 1.93                                | 25.71 | 25.66       | 25.90                       |
|         | 2            | 1.86                                | 25.39 |             |                             |
|         | 3            | 1.97                                | 25.89 |             |                             |
| 2       | 1            | 2.05                                | 26.24 | 26.05       | 25.90                       |
|         | 2            | 1.93                                | 25.71 |             |                             |
|         | 3            | 2.04                                | 26.19 |             |                             |
| 3       | 1            | 1.94                                | 25.76 | 25.98       | 25.90                       |
|         | 2            | 2.02                                | 26.11 |             |                             |
|         | 3            | 2.01                                | 26.06 |             |                             |

Table S49. Results of EDM test. ADAM electrode. Strategy 19.

| Replica | Initial electrode weight (g) | Initial work-piece weight (g) | Final electrode weight (g) | Final workpiece weight (g) | Electrode wear (g) | Workpiece wear (g) | Electrode wear (mm <sup>3</sup> ) | Workpiece wear (mm <sup>3</sup> ) | Process time (min) | Electrode wear rate (%) | Stock removal rate (mm <sup>3</sup> /min) |
|---------|------------------------------|-------------------------------|----------------------------|----------------------------|--------------------|--------------------|-----------------------------------|-----------------------------------|--------------------|-------------------------|-------------------------------------------|
| 1       | 36.5687                      | 89.0468                       | 36.5314                    | 88.9132                    | 0.0373             | 0.1336             | 4.3780                            | 47.3647                           | 16                 | 27.919                  | 9.243                                     |
| 2       | 36.5314                      | 88.9132                       | 36.5066                    | 88.7876                    | 0.0248             | 0.1256             | 2.9109                            | 44.5285                           | 14                 | 19.745                  | 6.537                                     |
| 3       | 36.5066                      | 88.7876                       | 36.4883                    | 88.6641                    | 0.0183             | 0.1235             | 2.1479                            | 43.7840                           | 15                 | 14.818                  | 4.906                                     |

Table S50. Workpiece roughness measurements. ADAM electrode. Strategy 19.

| Replica | Measure-ment | Arithmetical mean roughness | VDI | Average VDI | Workpiece |
|---------|--------------|-----------------------------|-----|-------------|-----------|
|---------|--------------|-----------------------------|-----|-------------|-----------|



| Ra (µm) |   |      |       | total average<br>VDI |       |
|---------|---|------|-------|----------------------|-------|
| 1       | 1 | 2.57 | 28.20 | 28.06                |       |
|         | 2 | 2.56 | 28.16 |                      |       |
|         | 3 | 2.46 | 27.82 |                      |       |
| 2       | 1 | 2.46 | 27.82 | 27.74                | 27.81 |
|         | 2 | 2.43 | 27.71 |                      |       |
|         | 3 | 2.42 | 27.68 |                      |       |
| 3       | 1 | 2.43 | 27.71 | 27.61                |       |
|         | 2 | 2.44 | 27.75 |                      |       |
|         | 3 | 2.34 | 27.38 |                      |       |
